# Supplementary material for: The Role of Interruptions in polyQ in the Pathology of SCA1
Source: PubMed Central journal article supplement (PMC3723530; doi:10.1371/journal.pgen.1003648), 2013-07-25

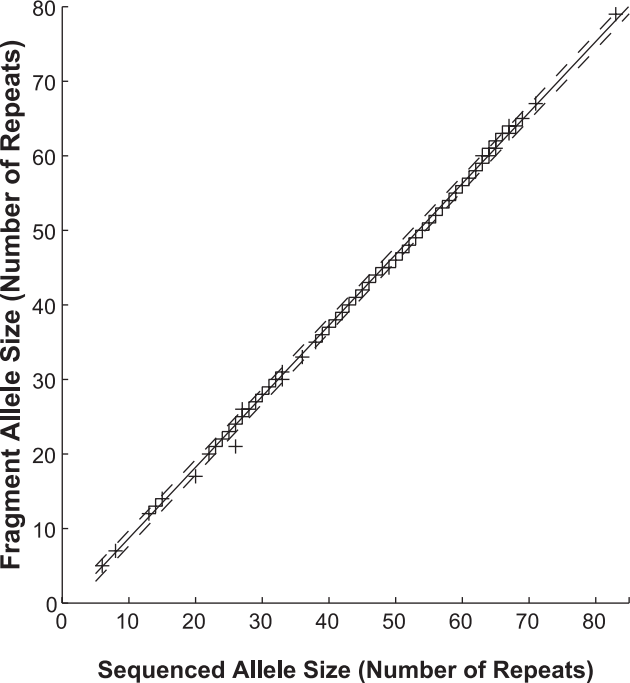

Supplement: pgen.1003648.s001.pdf [file pgen.1003648.s001.pdf]
