# Supplementary material for: The Role of Interruptions in polyQ in the Pathology of SCA1
Source: PubMed Central journal article supplement (PMC3723530; doi:10.1371/journal.pgen.1003648), 2013-07-25
Supplement: pgen.1003648.s005.pdf [file pgen.1003648.s005.pdf]

## Repeat Size

| Patient | Age at Onset (yrs) | Diagnostic Sizing |        | Mean Sequenced |                     |        |
|---------|--------------------|-------------------|--------|----------------|---------------------|--------|
|         |                    | Pathogenic        | Normal | Pathogenic     | Longest CAG Stretch | Normal |
| 1       | 42                 | 62                | 28     | 62             | 51                  | 30     |
| 2       | 40                 | 64                | 33     | 59             | 46                  | 29     |
| 3       | 32                 | 62                | 28     | 67             | 53                  | 30     |
| 4       | 44                 | 60                | 30     | 64             | 50                  | 30     |
| 5       | 41                 | 44                | 27     | 48             | 48                  | 29     |
| 6       | 43                 | 45                | 24     | 47             | 47                  | 25     |
| 7       | 41                 | 44                | 28     | 48             | 46                  | 30     |
| 8       | 43                 | 43                | 28     | 47             | 46                  | 31     |
| 9       | 37.5               | 45                | 26     | 47             | 46                  | 30     |
| 10      | 33                 | 51                | 32     | 50             | 50                  | 31     |
| 11      | 44                 | 42                | 24     | 46             | 46                  | 23     |
| 12      | 50                 | 43                | 24     | 46             | 46                  | 27     |
| 13      | 47                 | 43                | 30     | 48             | 48                  | 31     |
| 14      | 45                 | 44                | 27     | 47             | 47                  | 29     |
| 15      | 45                 | 41                | 28     | 46             | 46                  | 30     |
| 16      | 25                 | 50                | 24     | 53             | 53                  | 27     |
| 17      | 15                 | 58                | 31     | 61             | 61                  | 33     |
| 18      | 38                 | 45                | 30     | 48             | 48                  | 31     |
| 19      | 45                 | 47                | 30     | 50             | 50                  | 27     |
| 20      | 32                 | 43                | 27     | 47             | 47                  | 29     |
| 21      | 33                 | 44                | 27     | 48             | 48                  | 29     |
| 22      | 30                 | 47                | 30     | 50             | 50                  | 31     |
| 23      | 50                 | 45                | 23     | 45             | 43                  | 27     |
| 24      | 42                 | 45                | 28     | 48             | 48                  | 30     |
| 25      | 38                 | 41                | 26     | 45             | 45                  | 27     |
| 26      | 47                 | 39                | 27     | 42             | 40                  | 29     |
| 27      | 53                 | 39                | 27     | 42             | 42                  | 29     |
| 28      | 43                 | 42                | 27     | 45             | 45                  | 29     |
| 29      | 45                 | 40                | 27     | 44             | 44                  | 29     |
| 30      | 43                 | 50                | 28     | 52             | 52                  | 29     |
| 31      | 24                 | 55                | 30     | 57             | 57                  | 31     |
| 32      | 37                 | 52                | 25     | 52             | 52                  | 26     |
| 33      | 29.5               | 53                | 29     | 54             | 54                  | 30     |
| 34      | 50                 | 42                | 28     | 45             | 45                  | 30     |
| 35      | 42                 | 43                | 27     | 48             | 48                  | 27     |
