# Supplementary material for: The Role of Interruptions in polyQ in the Pathology of SCA1
Source: PLoS Genet. 2013 Jul 25;9(7):e1003648. doi: 10.1371/journal.pgen.1003648 (PMC3723530; doi:10.1371/journal.pgen.1003648)
Supplement: Table S1 — Frequency with which each clone sequence was detected for each individual. The bold line indicates the pathogenic threshold of ≥39 repeats. Individual #36 (+) is affected with SCA3, but has a borderline interrupted expansion in SCA1. The majority of uninterrupted clones have a size above the pathogenic threshold, whilst the majority of interrupted clones lie below the pathogenic threshold. (PDF) [file pgen.1003648.s003.pdf]

| Repeat Size | Repeat Sequence Configuration                                                   | Individual |   |   |   |   |   |   |   |   |    |    |    |    |    |    |    |    |    |    |    |    |    |    |    |    |    |    |    |    |    |    |    |    |    |    | Total |    |
|-------------|---------------------------------------------------------------------------------|------------|---|---|---|---|---|---|---|---|----|----|----|----|----|----|----|----|----|----|----|----|----|----|----|----|----|----|----|----|----|----|----|----|----|----|-------|----|
|             |                                                                                 | 1          | 2 | 3 | 4 | 5 | 6 | 7 | 8 | 9 | 10 | 11 | 12 | 13 | 14 | 15 | 16 | 17 | 18 | 19 | 20 | 21 | 22 | 23 | 24 | 25 | 26 | 27 | 28 | 29 | 30 | 31 | 32 | 33 | 34 | 35 |       | 36 |
| 6           | (CAG) <sub>6</sub>                                                              |            |   |   |   |   |   |   |   |   | 1  |    |    |    |    |    |    |    |    |    |    |    |    |    |    |    |    |    |    |    |    |    |    |    |    |    |       | 1  |
| 8           | (CAG) <sub>8</sub>                                                              |            |   |   |   |   |   |   |   |   |    |    |    |    |    |    |    |    |    |    |    |    |    |    | 1  |    |    |    |    |    |    |    |    |    |    |    |       | 1  |
| 13          | (CAG) <sub>13</sub>                                                             |            |   |   |   |   |   |   |   |   |    |    |    |    |    |    |    |    |    |    |    |    |    |    |    | 1  |    |    |    |    |    |    |    |    |    |    |       | 1  |
| 14          | (CAG) <sub>14</sub>                                                             |            |   | 1 |   |   |   |   |   |   |    |    |    |    |    |    |    |    |    |    |    |    |    |    |    |    |    |    |    |    |    |    |    |    |    |    |       | 1  |
| 15          | (CAG) <sub>15</sub>                                                             |            |   |   |   |   | 1 |   |   |   |    |    |    |    |    |    |    |    | 1  |    |    |    |    |    |    |    |    |    |    |    |    |    |    |    | 1  |    | 3     |    |
| 20          | (CAG) <sub>20</sub>                                                             |            |   |   |   |   |   |   |   |   |    |    |    |    |    |    |    |    |    |    |    |    |    |    |    |    | 1  |    |    |    |    |    |    |    |    |    |       | 1  |
| 22          | (CAG) <sub>22</sub> (CAT)(CAG)(CAT)(CAG) <sub>13</sub>                          |            |   |   |   |   |   |   |   |   |    |    |    |    |    |    |    |    |    |    |    |    |    |    |    | 1  |    |    |    |    |    |    |    |    |    |    |       | 1  |
| 22          | (CAG) <sub>22</sub> (CAT)(CAG)(CAT)(CAG) <sub>12</sub>                          |            |   |   |   |   |   |   |   |   |    |    |    |    |    |    |    |    |    |    |    |    |    |    |    | 1  |    |    |    |    |    |    |    |    |    |    |       | 1  |
| 23          | (CAG) <sub>23</sub> (CAT)(CAG)(CAT)(CAG) <sub>13</sub>                          |            |   | 1 |   |   |   |   |   |   |    |    |    |    |    |    |    |    |    |    |    |    |    |    |    |    |    |    |    |    |    |    |    |    |    |    |       | 9  |
| 24          | (CAG) <sub>24</sub> (CAT)(CAG) <sub>13</sub>                                    |            |   |   |   |   |   |   |   |   |    |    |    |    |    |    |    |    |    |    |    |    |    |    |    |    | 8  |    |    |    |    |    |    |    | 1  |    |       | 1  |
| 24          | (CAG) <sub>24</sub> (CAT)(CAG)(CAT)(CAG) <sub>10</sub>                          |            |   |   |   |   | 1 |   |   |   |    |    |    |    |    |    |    |    |    |    |    |    |    |    |    |    |    |    |    |    |    |    |    |    |    |    |       | 1  |
| 25          | (CAG) <sub>25</sub> (CAT)(CAG) <sub>14</sub>                                    |            |   |   |   |   |   |   |   |   |    | 2  | 1  |    |    |    |    |    |    |    |    |    |    |    |    |    |    |    |    |    |    |    |    |    | 1  |    |       | 4  |
| 25          | (CAG) <sub>25</sub> (CAT)(CAG) <sub>12</sub>                                    |            |   |   |   |   |   |   |   |   |    |    |    |    |    |    |    |    |    |    |    |    |    |    |    |    |    |    |    |    |    |    |    |    |    | 1  |       | 1  |
| 25          | (CAG) <sub>25</sub> (CAT)(CAG)(CAT)(CAG) <sub>10</sub>                          |            |   |   |   |   | 1 |   |   |   |    |    |    |    |    |    |    |    |    |    |    |    |    |    |    |    |    |    |    |    |    |    |    |    |    |    |       | 1  |
| 26          | (CAG) <sub>26</sub>                                                             |            |   |   |   |   | 1 |   |   |   |    |    |    |    |    |    |    |    |    |    |    |    |    |    |    |    |    |    |    |    |    |    |    |    |    |    |       | 1  |
| 26          | (CAG) <sub>26</sub> (CAT)(CAG) <sub>14</sub>                                    |            |   |   |   |   | 1 |   |   |   |    |    |    |    |    |    |    |    |    |    |    |    |    |    |    |    |    |    |    |    |    |    |    |    |    |    |       | 1  |
| 26          | (CAG) <sub>26</sub> (CAT)(CAG)(CAT)(CAG) <sub>10</sub>                          |            |   |   |   |   |   |   |   |   |    | 5  | 7  |    |    |    |    | 7  |    | 1  |    |    |    |    |    |    |    |    |    |    |    |    |    |    | 10 | 1  |       | 23 |
| 26          | (CAG) <sub>26</sub> (CAT)(CAG)(CAT)(CAG) <sub>10</sub>                          |            |   |   |   |   |   |   |   |   |    |    |    |    |    |    |    |    |    |    |    |    |    |    |    |    |    |    |    |    |    |    |    |    |    |    |       | 18 |
| 26          | (CAG) <sub>26</sub> (CAT)(CAG)(CAT) <sub>1</sub> (CAG) <sub>9</sub>             |            |   |   |   |   | 1 |   |   |   |    |    |    |    |    |    |    |    |    |    |    |    |    |    |    |    |    |    |    |    |    |    |    |    |    |    |       | 1  |
| 27          | (CAG) <sub>27</sub> (CAT)(CAG) <sub>16</sub>                                    |            |   |   |   |   |   |   |   |   |    |    |    |    |    |    |    |    |    |    |    |    |    |    |    |    |    |    |    |    |    |    |    |    |    |    |       | 1  |
| 27          | (CAG) <sub>27</sub> (CAT)(CAG) <sub>15</sub>                                    |            |   |   |   |   |   |   |   |   |    |    |    |    |    |    |    |    |    |    | 1  |    |    |    |    |    |    |    |    |    |    |    |    |    |    |    |       | 1  |
| 27          | (CAG) <sub>27</sub> (CAT)(CAG)(CAT)(CAG) <sub>13</sub>                          |            |   |   |   |   |   |   |   |   |    |    |    |    |    |    |    |    |    |    |    | 1  |    |    |    |    |    |    |    |    |    |    |    |    |    |    |       | 1  |
| 27          | (CAG) <sub>27</sub> (CAT)(CAG)(CAT)(CAG) <sub>12</sub>                          |            |   |   |   |   |   |   |   |   |    |    |    |    |    |    |    |    |    |    |    |    |    |    |    |    |    |    |    |    |    |    |    |    |    |    |       | 1  |
| 28          | (CAG) <sub>28</sub>                                                             |            |   |   |   |   |   |   |   |   |    |    |    |    |    |    |    |    |    |    |    |    |    |    |    |    |    |    |    |    |    |    |    |    |    |    |       | 1  |
| 28          | (CAG) <sub>28</sub> (CAT)(CAG) <sub>16</sub>                                    |            |   |   |   |   |   |   |   |   |    |    |    |    |    |    |    |    |    |    |    |    |    |    |    |    |    |    |    |    |    |    |    |    |    |    |       | 1  |
| 28          | (CAG) <sub>28</sub> (CAT)(CAG)(CAT)(CAG) <sub>14</sub>                          |            |   | 1 |   |   |   |   |   |   |    |    |    |    | 2  |    |    |    |    |    |    | 1  |    |    |    |    |    |    |    |    |    |    |    |    |    |    |       | 11 |
| 28          | (CAG) <sub>28</sub> (CAT)(CAG)(CAT)(CAG) <sub>13</sub>                          |            |   |   |   |   |   |   |   |   |    |    |    |    | 1  |    |    |    |    |    |    |    |    |    |    |    |    |    |    |    |    |    |    |    |    |    |       | 11 |
| 29          | (CAG) <sub>29</sub> (CAT)(CAG)(CAT)(CAG)(CAT)(CAG) <sub>14</sub>                |            |   |   |   |   |   |   |   |   |    |    |    |    |    |    |    |    |    |    |    |    |    |    |    |    |    |    |    |    |    |    |    |    |    |    |       | 14 |
| 29          | (CAG) <sub>29</sub> (CAT)(CAG)(CAT)(CAG) <sub>15</sub>                          |            |   |   |   |   |   |   |   |   |    |    |    |    |    |    |    |    |    |    |    |    |    |    |    |    |    |    |    |    |    |    |    |    |    |    |       | 1  |
| 29          | (CAG) <sub>29</sub> (CAT)(CAG)(CAT)(CAG) <sub>14</sub>                          |            |   |   |   |   |   |   |   |   |    |    |    |    |    |    |    |    |    |    |    |    |    |    |    |    |    |    |    |    |    |    |    |    |    |    |       | 5  |
| 29          | (CAG) <sub>29</sub> (CAT)(CAG)(CAT)(CAG) <sub>14</sub>                          |            |   |   |   |   |   |   |   |   |    |    |    |    |    |    |    |    |    |    |    |    |    |    |    |    |    |    |    |    |    |    |    |    |    |    |       | 2  |
| 29          | (CAG) <sub>29</sub> (CAT)(CAG)(CAT)(CAG) <sub>12</sub>                          |            |   |   |   |   |   |   |   |   |    |    |    |    |    |    |    |    |    |    |    |    |    |    |    |    |    |    |    |    |    |    |    |    |    |    |       | 2  |
| 29          | (CAG) <sub>29</sub> (CAT)(CAG)(CAT)(CAG) <sub>13</sub>                          |            |   |   |   |   |   |   |   |   |    |    |    |    |    |    |    |    |    |    |    |    |    |    |    |    |    |    |    |    |    |    |    |    |    |    |       | 1  |
| 29          | (CAG) <sub>29</sub> (CAT)(CAG)(CAT)(CAG) <sub>7</sub>                           |            |   |   |   |   |   |   |   |   |    |    |    |    |    |    |    |    |    |    |    |    |    |    |    |    |    |    |    |    |    |    |    |    |    |    |       | 1  |
| 30          | (CAG) <sub>30</sub>                                                             |            |   |   |   |   |   |   |   |   |    |    |    |    |    |    |    |    |    |    |    |    |    |    |    |    |    |    |    |    |    |    |    |    |    |    |       | 1  |
| 30          | (CAG) <sub>30</sub> (CAT)(CAG)(CAT)(CAG) <sub>16</sub>                          |            |   |   |   |   |   |   |   |   |    |    |    |    |    |    |    |    |    |    |    |    |    |    |    |    |    |    |    |    |    |    |    |    |    |    |       | 2  |
| 30          | (CAG) <sub>30</sub> (CAT)(CAG)(CAT)(CAG) <sub>15</sub>                          |            |   |   |   |   |   |   |   |   |    |    |    |    |    |    |    |    |    |    |    |    |    |    |    |    |    |    |    |    |    |    |    |    |    |    |       | 1  |
| 30          | (CAG) <sub>30</sub> (CAT)(CAG)(CAT)(CAG) <sub>10</sub>                          |            |   |   |   |   |   |   |   |   |    |    |    |    |    |    |    |    |    |    |    |    |    |    |    |    |    |    |    |    |    |    |    |    |    |    |       | 1  |
| 30          | (CAG) <sub>30</sub> (CAT)(CAG)(CAT)(CAG) <sub>14</sub>                          |            |   |   |   |   |   |   |   |   |    |    |    |    |    |    |    |    |    |    |    |    |    |    |    |    |    |    |    |    |    |    |    |    |    |    |       | 1  |
| 30          | (CAG) <sub>30</sub> (CAT)(CAG) <sub>15</sub>                                    |            |   |   |   |   |   |   |   |   |    |    |    |    |    |    |    |    |    |    |    |    |    |    |    |    |    |    |    |    |    |    |    |    |    |    |       | 1  |
| 31          | (CAG) <sub>31</sub>                                                             |            |   |   |   |   |   |   |   |   |    |    |    |    |    |    |    |    |    |    |    |    |    |    |    |    |    |    |    |    |    |    |    |    |    |    |       | 1  |
| 31          | (CAG) <sub>31</sub> (CAT)(CAG)(CAT)(CAG) <sub>16</sub>                          |            |   |   |   |   |   |   |   |   |    |    |    |    |    |    |    |    |    |    |    |    |    |    |    |    |    |    |    |    |    |    |    |    |    |    |       | 1  |
| 31          | (CAG) <sub>31</sub> (CAT)(CAG)(CAT)(CAG) <sub>15</sub>                          |            |   |   |   |   |   |   |   |   |    |    |    |    |    |    |    |    |    |    |    |    |    |    |    |    |    |    |    |    |    |    |    |    |    |    |       | 1  |
| 31          | (CAG) <sub>31</sub> (CAT)(CAG)(CAT)(CAG) <sub>14</sub>                          |            |   |   |   |   |   |   |   |   |    |    |    |    |    |    |    |    |    |    |    |    |    |    |    |    |    |    |    |    |    |    |    |    |    |    |       | 1  |
| 32          | (CAG) <sub>32</sub>                                                             |            |   |   |   |   |   |   |   |   |    |    |    |    |    |    |    |    |    |    |    |    |    |    |    |    |    |    |    |    |    |    |    |    |    |    |       | 1  |
| 32          | (CAG) <sub>32</sub> (CAT)(CAG)(CAT)(CAG) <sub>15</sub>                          |            |   |   |   |   |   |   |   |   |    |    |    |    |    |    |    |    |    |    |    |    |    |    |    |    |    |    |    |    |    |    |    |    |    |    |       | 1  |
| 32          | (CAG) <sub>32</sub> (CAT)(CAG)(CAT)(CAG) <sub>14</sub> (CAT)(CAG) <sub>10</sub> |            |   |   |   |   |   |   |   |   |    |    |    |    |    |    |    |    |    |    |    |    |    |    |    |    |    |    |    |    |    |    |    |    |    |    |       | 1  |
| 33          | (CAG) <sub>33</sub>                                                             |            |   |   |   |   |   |   |   |   |    |    |    |    |    |    |    |    |    |    |    |    |    |    |    |    |    |    |    |    |    |    |    |    |    |    |       | 1  |
| 33          | (CAG) <sub>33</sub> (CAT)(CAG)(CAT)(CAG) <sub>16</sub>                          |            |   |   |   |   |   |   |   |   |    |    |    |    |    |    |    |    |    |    |    |    |    |    |    |    |    |    |    |    |    |    |    |    |    |    |       | 1  |
| 36          | (CAG) <sub>36</sub>                                                             |            |   |   |   |   |   |   |   |   |    |    |    |    |    |    |    |    |    |    |    |    |    |    |    |    |    |    |    |    |    |    |    |    |    |    |       | 1  |
| 38          | (CAG) <sub>38</sub>                                                             |            |   |   |   |   |   |   |   |   |    |    |    |    |    |    |    |    |    |    |    |    |    |    |    |    |    |    |    |    |    |    |    |    |    |    |       | 1  |
| 38          | (CAG) <sub>38</sub> (CAT)(CAG)(CAT)(CAG) <sub>15</sub>                          |            |   |   |   |   |   |   |   |   |    |    |    |    |    |    |    |    |    |    |    |    |    |    |    |    |    |    |    |    |    |    |    |    |    |    |       | 1  |
| 39          | (CAG) <sub>39</sub>                                                             |            |   |   |   |   |   |   |   |   |    |    |    |    |    |    |    |    |    |    |    |    |    |    |    |    |    |    |    |    |    |    |    |    |    |    |       | 2  |
| 39          | (CAG) <sub>39</sub> (CAT)(CAG)(CAT)(CAG) <sub>18</sub>                          |            |   |   |   |   |   |   |   |   |    |    |    |    |    |    |    |    |    |    |    |    |    |    |    |    |    |    |    |    |    |    |    |    |    |    |       | 1  |
| 39          | (CAG) <sub>39</sub> (CAT)(CAG)(CAT)(CAG) <sub>14</sub>                          |            |   |   |   |   |   |   |   |   |    |    |    |    |    |    |    |    |    |    |    |    |    |    |    |    |    |    |    |    |    |    |    |    |    |    |       | 1  |
| 40          | (CAG) <sub>40</sub>                                                             |            |   |   |   |   |   |   |   |   |    |    |    |    |    |    |    |    |    |    |    |    |    |    |    |    |    |    |    |    |    |    |    |    |    |    |       | 3  |
| 40          | (CAG) <sub>40</sub> (CAT)(CAG)(CAT)(CAG) <sub>18</sub>                          |            |   |   |   |   |   |   |   |   |    |    |    |    |    |    |    |    |    |    |    |    |    |    |    |    |    |    |    |    |    |    |    |    |    |    |       | 1  |
| 40          | (CAG) <sub>40</sub> (CAT)(CAG)(CAT)(CAG) <sub>17</sub>                          |            |   |   |   |   |   |   |   |   |    |    |    |    |    |    |    |    |    |    |    |    |    |    |    |    |    |    |    |    |    |    |    |    |    |    |       | 4  |
| 41          | (CAG) <sub>41</sub>                                                             |            |   |   |   |   |   |   |   |   |    |    |    |    |    |    |    |    |    |    |    |    |    |    |    |    |    |    |    |    |    |    |    |    |    |    |       | 8  |
| 41          | (CAG) <sub>41</sub> (CAT)(CAG)(CAT)(CAG) <sub>18</sub>                          |            |   |   |   |   |   |   |   |   |    |    |    |    |    |    |    |    |    |    |    |    |    |    |    |    |    |    |    |    |    |    |    |    |    |    |       | 11 |
| 42          | (CAG) <sub>42</sub>                                                             |            |   |   |   |   |   |   |   |   |    |    |    |    |    |    |    |    |    |    |    |    |    |    |    |    |    |    |    |    |    |    |    |    |    |    |       | 7  |
| 42          | (CAG) <sub>42</sub> (CAT)(CAG)(CAT)(CAG) <sub>19</sub>                          |            |   |   |   |   |   |   |   |   |    |    |    |    |    |    |    |    |    |    |    |    |    |    |    |    |    |    |    |    |    |    |    |    |    |    |       | 1  |
| 42          | (CAG) <sub>42</sub> (CAT)(CAG)(CAT)(CAG) <sub>14</sub>                          |            |   |   |   |   |   |   |   |   |    |    |    |    |    |    |    |    |    |    |    |    |    |    |    |    |    |    |    |    |    |    |    |    |    |    |       | 1  |
| 43          | (CAG) <sub>43</sub>                                                             |            |   |   |   |   |   |   |   |   |    |    |    |    |    |    |    |    |    |    |    |    |    |    |    |    |    |    |    |    |    |    |    |    |    |    |       | 13 |
| 44          | (CAG) <sub>44</sub>                                                             |            |   |   |   |   |   |   |   |   |    |    |    |    | </ |    |    |    |    |    |    |    |    |    |    |    |    |    |    |    |    |    |    |    |    |    |       |    |
