# Supplementary material for: The Role of Interruptions in polyQ in the Pathology of SCA1
Source: PLoS Genet. 2013 Jul 25;9(7):e1003648. doi: 10.1371/journal.pgen.1003648 (PMC3723530; doi:10.1371/journal.pgen.1003648)
Supplement: Table S2 — Frequency with which each clone sequence was detected for each individual, corrected for the clone depth sequenced for each patient. The bold line indicates the pathogenic threshold of ≥39 repeats. The number of clones for each patient were expressed as a percentage and these were taken into account when expressing the overall percentage of each clone within the clone population (final column). (PDF) [file pgen.1003648.s004.pdf]

| Repeat Size | Repeat Sequence Configuration                                             | Individual |   |   |   |   |   |   |   |   |    |     |    |    |    |    |    |    |    |    |    |    |    |    |     |    |    |    |    |    |    |    |    |    |    |    |    | Total |     |
|-------------|---------------------------------------------------------------------------|------------|---|---|---|---|---|---|---|---|----|-----|----|----|----|----|----|----|----|----|----|----|----|----|-----|----|----|----|----|----|----|----|----|----|----|----|----|-------|-----|
|             |                                                                           | 1          | 2 | 3 | 4 | 5 | 6 | 7 | 8 | 9 | 10 | 11  | 12 | 13 | 14 | 15 | 16 | 17 | 18 | 19 | 20 | 21 | 22 | 23 | 24  | 25 | 26 | 27 | 28 | 29 | 30 | 31 | 32 | 33 | 34 | 35 | 36 |       |     |
| 6           | (CAG) <sub>6</sub>                                                        |            |   |   |   |   |   |   |   |   |    |     |    |    |    |    |    |    |    |    |    |    |    |    |     |    |    |    |    |    |    |    |    |    |    |    |    |       | 0.2 |
| 8           | (CAG) <sub>8</sub>                                                        |            |   |   |   |   |   |   |   |   |    | 6.7 |    |    |    |    |    |    |    |    |    |    |    |    | 2.0 |    |    |    |    |    |    |    |    |    |    |    |    | 0.1   |     |
| 13          | (CAG) <sub>13</sub>                                                       |            |   |   |   |   |   |   |   |   |    |     |    |    |    |    |    |    |    |    |    |    |    |    | 1.9 |    |    |    |    |    |    |    |    |    |    |    |    | 0.1   |     |
| 14          | (CAG) <sub>14</sub>                                                       |            |   |   |   |   |   |   |   |   |    |     |    |    |    |    |    |    |    |    |    |    |    |    |     |    |    |    |    |    |    |    |    |    |    |    |    | 0.2   |     |
| 15          | (CAG) <sub>15</sub>                                                       |            |   |   |   |   |   |   |   |   |    |     |    |    |    |    |    |    |    |    |    |    |    |    |     |    |    |    |    |    |    |    |    |    |    |    |    | 0.5   |     |
| 20          | (CAG) <sub>20</sub>                                                       |            |   |   |   |   |   |   |   |   |    |     |    |    |    |    |    |    |    |    |    |    |    |    |     |    |    |    |    |    |    |    |    |    |    |    |    | 0.1   |     |
| 22          | (CAG) <sub>4</sub> (CAT)(CAG)(CAT)(CAG) <sub>13</sub>                     |            |   |   |   |   |   |   |   |   |    |     |    |    |    |    |    |    |    |    |    |    |    |    |     |    |    |    |    |    |    |    |    |    |    |    |    | 0.1   |     |
| 22          | (CAG) <sub>4</sub> (CAT)(CAG)(CAT)(CAG) <sub>12</sub>                     |            |   |   |   |   |   |   |   |   |    |     |    |    |    |    |    |    |    |    |    |    |    |    |     |    |    |    |    |    |    |    |    |    |    |    |    | 0.1   |     |
| 23          | (CAG) <sub>4</sub> (CAT)(CAG)(CAT)(CAG) <sub>11</sub>                     |            |   |   |   |   |   |   |   |   |    |     |    |    |    |    |    |    |    |    |    |    |    |    |     |    |    |    |    |    |    |    |    |    |    |    |    | 0.6   |     |
| 24          | (CAG) <sub>10</sub> (CAT)(CAG) <sub>12</sub>                              |            |   |   |   |   |   |   |   |   |    |     |    |    |    |    |    |    |    |    |    |    |    |    |     |    |    |    |    |    |    |    |    |    |    |    |    | 0.1   |     |
| 24          | (CAG) <sub>11</sub> (CAT)(CAG)(CAT)(CAG) <sub>12</sub>                    |            |   |   |   |   |   |   |   |   |    |     |    |    |    |    |    |    |    |    |    |    |    |    |     |    |    |    |    |    |    |    |    |    |    |    |    | 0.1   |     |
| 25          | (CAG) <sub>10</sub> (CAT)(CAG) <sub>14</sub>                              |            |   |   |   |   |   |   |   |   |    |     |    |    |    |    |    |    |    |    |    |    |    |    |     |    |    |    |    |    |    |    |    |    |    |    |    | 0.7   |     |
| 25          | (CAG) <sub>11</sub> (CAT)(CAG) <sub>13</sub>                              |            |   |   |   |   |   |   |   |   |    |     |    |    |    |    |    |    |    |    |    |    |    |    |     |    |    |    |    |    |    |    |    |    |    |    |    | 0.1   |     |
| 25          | (CAG) <sub>10</sub> (CAT)(CAG)(CAG)(CAT)(CAG) <sub>10</sub>               |            |   |   |   |   |   |   |   |   |    |     |    |    |    |    |    |    |    |    |    |    |    |    |     |    |    |    |    |    |    |    |    |    |    |    |    | 0.1   |     |
| 26          | (CAG) <sub>16</sub>                                                       |            |   |   |   |   |   |   |   |   |    |     |    |    |    |    |    |    |    |    |    |    |    |    |     |    |    |    |    |    |    |    |    |    |    |    |    | 0.1   |     |
| 26          | (CAG) <sub>11</sub> (CAT)(CAG) <sub>14</sub>                              |            |   |   |   |   |   |   |   |   |    |     |    |    |    |    |    |    |    |    |    |    |    |    |     |    |    |    |    |    |    |    |    |    |    |    |    | 3.7   |     |
| 26          | (CAG) <sub>10</sub> (CAT)(CAG)(CAT)(CAG) <sub>10</sub>                    |            |   |   |   |   |   |   |   |   |    |     |    |    |    |    |    |    |    |    |    |    |    |    |     |    |    |    |    |    |    |    |    |    |    |    |    | 2.5   |     |
| 26          | (CAG) <sub>10</sub> (CAT)(CAG)(CAG)(CAT) <sub>11</sub> (CAG) <sub>5</sub> |            |   |   |   |   |   |   |   |   |    |     |    |    |    |    |    |    |    |    |    |    |    |    |     |    |    |    |    |    |    |    |    |    |    |    |    | 0.1   |     |
| 27          | (CAG) <sub>10</sub> (CAT)(CAG) <sub>16</sub>                              |            |   |   |   |   |   |   |   |   |    |     |    |    |    |    |    |    |    |    |    |    |    |    |     |    |    |    |    |    |    |    |    |    |    |    |    | 0.1   |     |
| 27          | (CAG) <sub>11</sub> (CAT)(CAG) <sub>15</sub>                              |            |   |   |   |   |   |   |   |   |    |     |    |    |    |    |    |    |    |    |    |    |    |    |     |    |    |    |    |    |    |    |    |    |    |    |    | 0.2   |     |
| 27          | (CAG) <sub>11</sub> (CAT)(CAG)(CAT)(CAG) <sub>13</sub>                    |            |   |   |   |   |   |   |   |   |    |     |    |    |    |    |    |    |    |    |    |    |    |    |     |    |    |    |    |    |    |    |    |    |    |    |    | 0.1   |     |
| 27          | (CAG) <sub>10</sub> (CAT)(CAG)(CAT)(CAG) <sub>12</sub>                    |            |   |   |   |   |   |   |   |   |    |     |    |    |    |    |    |    |    |    |    |    |    |    |     |    |    |    |    |    |    |    |    |    |    |    |    | 0.2   |     |
| 28          | (CAG) <sub>16</sub>                                                       |            |   |   |   |   |   |   |   |   |    |     |    |    |    |    |    |    |    |    |    |    |    |    |     |    |    |    |    |    |    |    |    |    |    |    |    | 0.1   |     |
| 28          | (CAG) <sub>11</sub> (CAT)(CAG) <sub>14</sub>                              |            |   |   |   |   |   |   |   |   |    |     |    |    |    |    |    |    |    |    |    |    |    |    |     |    |    |    |    |    |    |    |    |    |    |    |    | 1.6   |     |
| 28          | (CAG) <sub>12</sub> (CAT)(CAG)(CAT)(CAG) <sub>14</sub>                    |            |   |   |   |   |   |   |   |   |    |     |    |    |    |    |    |    |    |    |    |    |    |    |     |    |    |    |    |    |    |    |    |    |    |    |    | 1.4   |     |
| 28          | (CAG) <sub>12</sub> (CAT)(CAG)(CAT)(CAG) <sub>13</sub>                    |            |   |   |   |   |   |   |   |   |    |     |    |    |    |    |    |    |    |    |    |    |    |    |     |    |    |    |    |    |    |    |    |    |    |    |    | 1.5   |     |
| 29          | (CAG) <sub>10</sub> (CAT)(CAG)(CAT)(CAG)(CAT)(CAG) <sub>14</sub>          |            |   |   |   |   |   |   |   |   |    |     |    |    |    |    |    |    |    |    |    |    |    |    |     |    |    |    |    |    |    |    |    |    |    |    |    | 0.1   |     |
| 29          | (CAG) <sub>11</sub> (CAT)(CAG)(CAT)(CAG) <sub>13</sub>                    |            |   |   |   |   |   |   |   |   |    |     |    |    |    |    |    |    |    |    |    |    |    |    |     |    |    |    |    |    |    |    |    |    |    |    |    | 0.8   |     |
| 29          | (CAG) <sub>12</sub> (CAT)(CAG)(CAT)(CAG) <sub>14</sub>                    |            |   |   |   |   |   |   |   |   |    |     |    |    |    |    |    |    |    |    |    |    |    |    |     |    |    |    |    |    |    |    |    |    |    |    |    | 15.8  |     |
| 29          | (CAG) <sub>12</sub> (CAT)(CAG)(CAT)(CAG)(CAT)(CAG) <sub>12</sub>          |            |   |   |   |   |   |   |   |   |    |     |    |    |    |    |    |    |    |    |    |    |    |    |     |    |    |    |    |    |    |    |    |    |    |    |    | 0.1   |     |
| 29          | (CAG) <sub>10</sub> (CAT)(CAG)(CAT)(CAG) <sub>11</sub>                    |            |   |   |   |   |   |   |   |   |    |     |    |    |    |    |    |    |    |    |    |    |    |    |     |    |    |    |    |    |    |    |    |    |    |    |    | 0.2   |     |
| 29          | (CAG) <sub>10</sub> (CAT)(CAG)(CAT)(CAG)(CAG) <sub>2</sub>                |            |   |   |   |   |   |   |   |   |    |     |    |    |    |    |    |    |    |    |    |    |    |    |     |    |    |    |    |    |    |    |    |    |    |    |    | 0.1   |     |
| 30          | (CAG) <sub>10</sub>                                                       |            |   |   |   |   |   |   |   |   |    |     |    |    |    |    |    |    |    |    |    |    |    |    |     |    |    |    |    |    |    |    |    |    |    |    |    | 2.7   |     |
| 30          | (CAG) <sub>11</sub> (CAT)(CAG)(CAT)(CAG) <sub>12</sub>                    |            |   |   |   |   |   |   |   |   |    |     |    |    |    |    |    |    |    |    |    |    |    |    |     |    |    |    |    |    |    |    |    |    |    |    |    | 0.4   |     |
| 30          | (CAG) <sub>10</sub> (CAT)(CAT)(CAG)(CAT)(CAG) <sub>12</sub>               |            |   |   |   |   |   |   |   |   |    |     |    |    |    |    |    |    |    |    |    |    |    |    |     |    |    |    |    |    |    |    |    |    |    |    |    | 0.3   |     |
| 30          | (CAG) <sub>11</sub> (CAT)(CAG)(CAT)(CAG) <sub>13</sub>                    |            |   |   |   |   |   |   |   |   |    |     |    |    |    |    |    |    |    |    |    |    |    |    |     |    |    |    |    |    |    |    |    |    |    |    |    | 0.8   |     |
| 30          | (CAG) <sub>10</sub> (CAT)(CAG) <sub>12</sub>                              |            |   |   |   |   |   |   |   |   |    |     |    |    |    |    |    |    |    |    |    |    |    |    |     |    |    |    |    |    |    |    |    |    |    |    |    | 0.1   |     |
| 31          | (CAG) <sub>11</sub>                                                       |            |   |   |   |   |   |   |   |   |    |     |    |    |    |    |    |    |    |    |    |    |    |    |     |    |    |    |    |    |    |    |    |    |    |    |    | 0.2   |     |
| 31          | (CAG) <sub>12</sub> (CAT)(CAG)(CAG)(CAT)(CAG) <sub>14</sub>               |            |   |   |   |   |   |   |   |   |    |     |    |    |    |    |    |    |    |    |    |    |    |    |     |    |    |    |    |    |    |    |    |    |    |    |    | 3.0   |     |
| 31          | (CAG) <sub>12</sub> (CAT)(CAG)(CAG)(CAT)(CAG) <sub>13</sub>               |            |   |   |   |   |   |   |   |   |    |     |    |    |    |    |    |    |    |    |    |    |    |    |     |    |    |    |    |    |    |    |    |    | </ |    |    |       |     |
